# Supplementary material for: Artesunate induces tumor cell cycle arrest in the G0/G1 phase by targeting cyclin-dependent kinase 4 (CDK4)
Source: Research Square preprint supplement (doi:10.21203/rs.3.rs-7854499/v1), 2025-11-18
Supplement: Supplementary file 1 [file 7ab18cc1c314de4f9cb7f6a9.xlsx]

## Sheet: Specifically detected protein
Block	Column	Row	Name	ID	F635 Median_Biotin	F635 Mean_Biotin	B635 Median_Biotin	B635 Mean_Biotin	B635 SD_Biotin	F635 Median - B635 Median_Biotin	SNR 635_Biotin	I_Biotin	Z_Score_Biotin	F635 Median_14-Bio	F635 Mean_14-Bio	B635 Median_14-Bio	B635 Mean_14-Bio	B635 SD_14-Bio	F635 Median - B635 Median_14-Bio	SNR 635_14-Bio	I_14-Bio	Z_Score_14-Bio	IMean_Biotin	IMean_Artesunate-Bio	IMean_Ratio
10	27	21	CDK4	JHU12743.B10C27	2463	2407	110	674	2108	2353	0.822	22.3909	2.12857	4446	4448	84	482	1826	4362	2.172	52.9286	6.18846	21.0692	49.9497	2.37074
10	27	22	CDK4	JHU12743.B10C27	2034	2239	103	467	1698	1931	1.044	19.7476	1.7804	4838	4699	103	378	1471	4735	2.937	46.9709	5.39469	21.0692	49.9497	2.37074
1	18	11	ZMYM3	JHU00766.B1C18	1453	1483	49	106	142	1404	9.697	29.6531	3.08513	1630	1669	49	101	129	1581	12.155	33.2653	3.56863	27.8854	32.8927	1.17957
1	18	12	ZMYM3	JHU00766.B1C18	1332	1369	51	108	139	1281	9.072	26.1176	2.61945	1626	1694	50	96	119	1576	13.429	32.52	3.46933	27.8854	32.8927	1.17957
15	29	73	HSPBAP1	JHU00813.B15C29	1246	1293	56	106	124	1190	9.573	22.25	2.11001	1732	1777	49	100	131	1683	12.802	35.3469	3.84597	23.0602	31.5189	1.36681
15	29	74	HSPBAP1	JHU00813.B15C29	1289	1315	54	98	110	1235	11.064	23.8704	2.32345	1523	1551	55	111	153	1468	9.412	27.6909	2.82593	23.0602	31.5189	1.36681
14	30	71	SH2B1	JHU01222.B14C30	1202	1297	51	98	111	1151	10.802	23.5686	2.2837	1667	1744	60	115	140	1607	11.636	27.7833	2.83824	24.4706	27.6495	1.12991
14	30	72	SH2B1	JHU01222.B14C30	1294	1344	51	98	126	1243	9.889	25.3725	2.52131	1761	1742	64	115	135	1697	12.052	27.5156	2.80257	24.4706	27.6495	1.12991
4	32	41	TCAP	JHU01625.B4C32	1643	1679	56	110	154	1587	10.188	29.3393	3.0438	1716	1763	55	108	129	1661	12.829	31.2	3.29346	27.6273	29.725	1.07593
4	32	42	TCAP	JHU01625.B4C32	1529	1632	59	116	144	1470	10.528	25.9153	2.59279	1695	1716	60	112	143	1635	11.217	28.25	2.90042	27.6273	29.725	1.07593
15	3	13	NUP62CL	JHU01883.B15C3	1396	1488	49	95	110	1347	12.664	28.4898	2.9319	1866	1945	60	113	129	1806	14.202	31.1	3.28014	27.4508	30.3948	1.10725
15	3	14	NUP62CL	JHU01883.B15C3	1347	1457	51	103	128	1296	10.578	26.4118	2.65819	1722	1840	58	115	166	1664	10.392	29.6897	3.09223	27.4508	30.3948	1.10725
15	21	83	PELO	JHU02265.B15C21	1432	1481	52	101	124	1380	11.129	27.5385	2.8066	1664	1799	51	101	127	1613	13.37	32.6275	3.48364	24.9673	30.6442	1.22737
15	21	84	PELO	JHU02265.B15C21	1187	1315	53	104	129	1134	9.388	22.3962	2.12927	1691	1785	59	109	132	1632	12.697	28.661	2.95518	24.9673	30.6442	1.22737
4	30	39	CENPM	JHU02605.B4C30	1815	1831	64	126	160	1751	10.656	28.3594	2.91473	1874	1898	61	121	161	1813	11.037	30.7213	3.22968	26.2154	29.2035	1.11398
4	30	40	CENPM	JHU02605.B4C30	1685	1797	70	139	179	1615	9.263	24.0714	2.34993	1938	1915	70	126	161	1868	11.112	27.6857	2.82523	26.2154	29.2035	1.11398
4	21	37	GSTO1	JHU02626.B4C21	1583	1588	58	110	131	1525	11.282	27.2931	2.77428	1932	1851	62	115	137	1870	12.672	31.1613	3.2883	26.2284	29.9331	1.14125
4	21	38	GSTO1	JHU02626.B4C21	1384	1400	55	105	121	1329	10.702	25.1636	2.49379	1751	1727	61	110	129	1690	12.535	28.7049	2.96103	26.2284	29.9331	1.14125
4	23	43	BCS1L	JHU02696.B4C23	1505	1587	61	113	130	1444	11.338	24.6721	2.42905	1975	1988	67	119	137	1908	13.642	29.4776	3.06398	22.7207	30.4929	1.34208
4	23	44	BCS1L	JHU02696.B4C23	1350	1492	65	132	412	1285	3.301	20.7692	1.91497	1922	1838	61	116	132	1861	13.045	31.5082	3.33452	22.7207	30.4929	1.34208
4	6	43	YKT6	JHU02973.B4C6	1524	1600	55	121	165	1469	8.964	27.7091	2.82907	1889	1882	60	114	137	1829	12.905	31.4833	3.33121	25.4212	32.7417	1.28797
4	6	44	YKT6	JHU02973.B4C6	1388	1547	60	120	163	1328	8.755	23.1333	2.22636	1836	1801	54	113	139	1782	12.144	34	3.66652	25.4212	32.7417	1.28797
1	14	49	EFHC1	JHU03202.B1C14	1499	1515	56	114	169	1443	8.29	26.7679	2.7051	1663	1707	57	108	128	1606	12.492	29.1754	3.02372	26.0089	28.7826	1.10664
1	14	50	EFHC1	JHU03202.B1C14	1313	1341	52	115	175	1261	7.006	25.25	2.50517	1675	1720	59	108	125	1616	12.896	28.3898	2.91905	26.0089	28.7826	1.10664
3	9	49	GNL1	JHU03208.B3C9	1333	1348	52	99	114	1281	10.956	25.6346	2.55583	1547	1588	56	105	123	1491	12.057	27.625	2.81714	22.9035	27.9034	1.2183
3	9	50	GNL1	JHU03208.B3C9	1170	1231	58	114	144	1112	7.757	20.1724	1.83636	1550	1582	55	105	123	1495	12.008	28.1818	2.89133	22.9035	27.9034	1.2183
2	14	49	GTF3C5	JHU03209.B2C14	1479	1529	62	111	130	1417	10.908	23.8548	2.3214	1704	1723	54	111	128	1650	12.594	31.5556	3.34083	23.8485	31.2323	1.30962
2	14	50	GTF3C5	JHU03209.B2C14	1359	1481	57	112	142	1302	9.641	23.8421	2.31972	1700	1714	55	106	122	1645	13.18	30.9091	3.2547	23.8485	31.2323	1.30962
4	10	53	WDFY2	JHU03450.B4C10	1748	1793	55	113	199	1693	8.442	31.7818	3.36552	1732	1925	62	117	158	1670	11.443	27.9355	2.85851	29.1754	29.9314	1.02591
4	10	54	WDFY2	JHU03450.B4C10	1541	1607	58	132	230	1483	6.413	26.569	2.6789	1756	1825	55	105	123	1701	13.984	31.9273	3.39036	29.1754	29.9314	1.02591
3	32	57	TMEM263	JHU03555.B3C32	1473	1623	57	104	124	1416	12.25	25.8421	2.58316	2605	2651	56	107	130	2549	19.569	46.5179	5.33433	29.8574	42.0226	1.40744
3	32	58	TMEM263	JHU03555.B3C32	1863	2021	55	103	127	1808	15.102	33.8727	3.64093	2064	2212	55	104	127	2009	16.598	37.5273	4.13647	29.8574	42.0226	1.40744
10	3	89	MCM5	JHU03984.B10C3	1386	1496	55	105	125	1331	11.128	25.2	2.49858	1852	2045	59	105	116	1793	16.724	31.3898	3.31875	24.0554	30.3673	1.26239
10	3	90	MCM5	JHU03984.B10C3	1283	1441	56	107	130	1227	10.262	22.9107	2.19704	1702	1856	58	111	134	1644	13.022	29.3448	3.04629	24.0554	30.3673	1.26239
9	5	87	SLC6A15	JHU04303.B9C5	1494	1656	52	100	130	1442	11.969	28.7308	2.96365	1548	1674	56	108	122	1492	12.836	27.6429	2.81952	27.896	29.1894	1.04636
9	5	88	SLC6A15	JHU04303.B9C5	1326	1495	49	97	125	1277	11.184	27.0612	2.74374	1629	1761	53	113	140	1576	11.771	30.7358	3.23162	27.896	29.1894	1.04636
4	22	67	RBFOX2	JHU04381.B4C22	1502	1555	60	110	127	1442	11.378	25.0333	2.47663	1617	1719	56	104	123	1561	13.13	28.875	2.98369	23.964	29.192	1.21816
4	22	68	RBFOX2	JHU04381.B4C22	1305	1413	57	112	151	1248	8.616	22.8947	2.19494	1623	1672	55	105	139	1568	11.273	29.5091	3.06817	23.964	29.192	1.21816
15	14	17	TFPT	JHU04884.B15C14	1075	1122	48	99	123	1027	8.317	22.3958	2.12922	1696	1729	51	101	119	1645	13.681	33.2549	3.56724	21.2604	31.7044	1.49124
15	14	18	TFPT	JHU04884.B15C14	966	1014	48	98	124	918	7.387	20.125	1.83011	1568	1666	52	104	124	1516	12.597	30.1538	3.15407	21.2604	31.7044	1.49124
14	21	69	TSSC4	JHU04983.B14C21	1431	1458	55	103	136	1376	9.963	26.0182	2.60635	2085	2079	55	111	127	2030	15.496	37.9091	4.18734	25.6909	36.0817	1.40445
14	21	70	TSSC4	JHU04983.B14C21	1395	1436	55	106	131	1340	10.153	25.3636	2.52013	2021	2038	59	114	136	1962	14.147	34.2542	3.70039	25.6909	36.0817	1.40445
1	27	89	PFKFB3	JHU05527.B1C27	1494	1528	56	117	156	1438	9.045	26.6786	2.69333	2256	2268	58	112	133	2198	16.211	38.8966	4.31891	26.3874	36.1626	1.37045
1	27	90	PFKFB3	JHU05527.B1C27	1357	1393	52	111	153	1305	8.379	26.0962	2.61662	1872	1873	56	108	126	1816	14.008	33.4286	3.59038	26.3874	36.1626	1.37045
1	4	89	PRKAR1A	JHU05633.B1C4	1173	1193	53	105	137	1120	7.942	22.1321	2.09448	1829	1896	58	113	148	1771	12.047	31.5345	3.33802	22.9582	32.8849	1.43238
1	4	90	PRKAR1A	JHU05633.B1C4	1213	1213	51	105	133	1162	8.331	23.7843	2.31211	1746	1803	51	104	142	1695	11.965	34.2353	3.69786	22.9582	32.8849	1.43238
3	25	87	USP2	JHU05656.B3C25	1485	1519	49	97	133	1436	10.692	30.3061	3.17115	1582	1635	47	101	128	1535	11.984	33.6596	3.62116	26.9668	32.6898	1.21222
3	25	88	USP2	JHU05656.B3C25	1205	1336	51	99	133	1154	9.301	23.6275	2.29145	1586	1543	50	106	153	1536	9.392	31.72	3.36274	26.9668	32.6898	1.21222
7	25	1	DNMT3A	JHU05986.B7C25	1145	1111	47	99	139	1098	7.281	24.3617	2.38816	1454	1454	52	101	121	1402	11.182	27.9615	2.86198	21.2829	27.7921	1.30584
7	25	2	DNMT3A	JHU05986.B7C25	892	954	49	103	144	843	5.91	18.2041	1.5771	1464	1386	53	103	121	1411	10.603	27.6226	2.81683	21.2829	27.7921	1.30584
5	30	1	GAD1	JHU06084.B5C30	1315	1355	54	105	122	1261	10.246	24.3519	2.38686	1781	1778	54	103	123	1727	13.618	32.9815	3.53081	23.5926	31.5265	1.33629
5	30	2	GAD1	JHU06084.B5C30	1233	1279	54	105	118	1179	9.949	22.8333	2.18685	1684	1742	56	107	122	1628	13.402	30.0714	3.14309	23.5926	31.5265	1.33629
14	5	77	ZC3HAV1	JHU06237.B14C5	1304	1349	63	114	168	1241	7.351	20.6984	1.90564	1546	1637	56	112	130	1490	11.731	27.6071	2.81477	19.6219	27.8125	1.41742
14	5	78	ZC3HAV1	JHU06237.B14C5	1224	1281	66	114	140	1158	8.336	18.5455	1.62206	1569	1610	56	109	127	1513	11.819	28.0179	2.86949	19.6219	27.8125	1.41742
8	11	7	PRKCZ	JHU06400.B8C11	1717	1891	57	109	129	1660	13.814	30.1228	3.147	1670	1774	56	107	133	1614	12.534	29.8214	3.10979	27.545	29.8125	1.08232
8	11	8	PRKCZ	JHU06400.B8C11	1523	1688	61	112	136	1462	11.588	24.9672	2.46792	1669	1764	56	113	146	1613	11.308	29.8036	3.10741	27.545	29.8125	1.08232
18	3	15	FGD2	JHU06454.B18C3	1269	1335	63	116	141	1206	8.645	20.1429	1.83247	1705	1766	60	120	141	1645	11.674	28.4167	2.92262	19.4637	27.9861	1.43786
18	3	16	FGD2	JHU06454.B18C3	1221	1230	65	120	145	1156	7.655	18.7846	1.65356	1736	1785	63	112	124	1673	13.492	27.5556	2.80789	19.4637	27.9861	1.43786
16	5	87	ALDH4A1	JHU06916.B16C5	1743	1739	71	126	178	1672	9.062	24.5493	2.41287	2462	2421	79	146	187	2383	12.166	31.1646	3.28874	23.8099	30.576	1.28418
16	5	88	ALDH4A1	JHU06916.B16C5	1638	1641	71	123	146	1567	10.397	23.0704	2.21808	2399	2313	80	143	163	2319	13.313	29.9875	3.13191	23.8099	30.576	1.28418
6	5	23	PAPSS2	JHU06970.B6C5	1438	1440	50	99	113	1388	11.867	28.76	2.9675	1637	1723	56	102	110	1581	14.736	29.2321	3.03127	26.8608	29.3846	1.09396
6	5	24	PAPSS2	JHU06970.B6C5	1298	1324	52	102	119	1246	10.269	24.9615	2.46717	1595	1656	54	104	115	1541	13.496	29.537	3.07189	26.8608	29.3846	1.09396
6	22	21	ACAP2	JHU07020.B6C22	1617	1660	57	111	137	1560	11.307	28.3684	2.91592	1960	1911	70	129	152	1890	11.724	28	2.86711	26.9639	28.8359	1.06943
6	22	22	ACAP2	JHU07020.B6C22	1508	1566	59	115	135	1449	10.748	25.5593	2.54591	1899	1988	64	122	144	1835	12.958	29.6719	3.08986	26.9639	28.8359	1.06943
5	27	21	HOOK3	JHU07044.B5C27	1162	1384	50	111	154	1112	8.266	23.24	2.24041	1968	2517	55	113	214	1913	11.234	35.7818	3.90392	26.0644	33.4545	1.28353
5	27	22	HOOK3	JHU07044.B5C27	1560	2069	54	112	149	1506	13.134	28.8889	2.98447	1712	1998	55	110	212	1657	8.906	31.1273	3.28377	26.0644	33.4545	1.28353
7	24	23	LIMCH1	JHU07124.B7C24	1691	1657	51	103	125	1640	12.432	33.1569	3.54664	1824	1819	54	108	135	1770	12.674	33.7778	3.63691	30.1863	32.2343	1.06785
7	24	24	LIMCH1	JHU07124.B7C24	1388	1434	51	103	130	1337	10.238	27.2157	2.76408	1688	1681	55	108	132	1633	11.917	30.6909	3.22563	30.1863	32.2343	1.06785
6	16	19	KCNAB2	JHU07150.B6C16	1631	1780	57	102	111	1574	15.117	28.614	2.94827	1713	1812	55	104	119	1658	14.353	31.1455	3.28619	28.0015	29.4456	1.05157
6	16	20	KCNAB2	JHU07150.B6C16	1479	1505	54	103	114	1425	12.298	27.3889	2.7869	1637	1807	59	110	128	1578	13.258	27.7458	2.83323	28.0015	29.4456	1.05157
15	15	85	PNMT	JHU07360.B15C15	1416	1441	57	101	119	1359	11.261	24.8421	2.45144	1806	1837	60	113	137	1746	12.584	30.1	3.1469	24.8562	32.3962	1.30334
15	15	86	PNMT	JHU07360.B15C15	1343	1386	54	102	114	1289	11.263	24.8704	2.45516	1804	1841	52	106	134	1752	12.948	34.6923	3.75875	24.8562	32.3962	1.30334
16	18	67	STAU2	JHU07762.B16C18	1663	1638	49	97	112	1614	13.759	33.9388	3.64963	2024	2139	62	115	140	1962	14.457	32.6452	3.486	29.6361	31.7059	1.06984
16	18	68	STAU2	JHU07762.B16C18	1368	1465	54	112	146	1314	9.267	25.3333	2.51614	1846	1870	60	113	160	1786	10.981	30.7667	3.23572	29.6361	31.7059	1.06984
6	18	35	GNMT	JHU08003.B6C18	1523	1537	53	98	105	1470	13.705	28.7358	2.96431	1746	1708	58	107	122	1688	13.123	30.1034	3.14736	27.6087	29.4247	1.06578
6	18	36	GNMT	JHU08003.B6C18	1430	1432	54	99	110	1376	12.118	26.4815	2.66737	1811	1809	63	113	134	1748	12.657	28.746	2.9665	27.6087	29.4247	1.06578
7	10	41	TGM1	JHU08437.B7C10	1559	1634	61	113	139	1498	10.942	25.5574	2.54565	1985	1982	64	117	134	1921	13.918	31.0156	3.26889	26.4878	31.9552	1.20641
7	10	42	TGM1	JHU08437.B7C10	1508	1546	55	106	129	1453	11.163	27.4182	2.79075	1875	1876	57	114	171	1818	10.304	32.8947	3.51926	26.4878	31.9552	1.20641
14	15	85	AK5	JHU08451.B14C15	1952	1940	63	116	136	1889	13.412	30.9841	3.26045	2848	2805	68	122	152	2780	17.651	41.8824	4.71672	28.5278	41.0126	1.43764
14	15	86	AK5	JHU08451.B14C15	1825	1846	70	126	142	1755	12.113	26.0714	2.61336	2810	2794	70	148	209	2740	12.66	40.1429	4.48496	28.5278	41.0126	1.43764
7	4	51	AKR7A3	JHU09026.B7C4	1472	1560	55	99	123	1417	11.878	26.7636	2.70454	1888	1859	57	107	128	1831	13.688	33.1228	3.54964	26.9406	32.5707	1.20898
7	4	52	AKR7A3	JHU09026.B7C4	1383	1459	51	100	128	1332	10.617	27.1176	2.75117	1729	1815	54	105	124	1675	13.79	32.0185	3.40251	26.9406	32.5707	1.20898
7	4	59	GPS1	JHU09442.B7C4	1376	1521	56	119	157	1320	8.93	24.5714	2.41579	1915	1971	63	115	141	1852	13.163	30.3968	3.18645	26.4396	29.2234	1.10529
7	4	60	GPS1	JHU09442.B7C4	1472	1438	52	118	168	1420	7.857	28.3077	2.90792	1683	1670	60	110	124	1623	12.581	28.05	2.87377	26.4396	29.2234	1.10529
15	6	13	ARMCX6	JHU09605.B15C6	1439	1536	49	96	114	1390	12.632	29.3673	3.04749	1954	1977	54	112	189	1900	9.868	36.1852	3.95766	28.1941	34.5734	1.22626
15	6	14	ARMCX6	JHU09605.B15C6	1297	1414	48	98	125	1249	10.528	27.0208	2.73842	1714	1799	52	102	127	1662	13.362	32.9615	3.52816	28.1941	34.5734	1.22626
7	15	63	DDX43	JHU09623.B7C15	1155	1254	52	97	112	1103	10.33	22.2115	2.10495	1647	1748	54	100	119	1593	13.849	30.5	3.20019	19.0567	29.4815	1.54704
7	15	64	DDX43	JHU09623.B7C15	811	853	51	98	114	760	6.623	15.902	1.27387	1537	1559	54	99	113	1483	12.92	28.463	2.92879	19.0567	29.4815	1.54704
8	29	63	IMPDH1	JHU09734.B8C29	1163	1162	58	109	134	1105	7.858	20.0517	1.82046	2233	2281	71	132	164	2162	13.104	31.4507	3.32686	19.3509	31.5121	1.62846
8	29	64	IMPDH1	JHU09734.B8C29	1119	1129	60	111	140	1059	7.271	18.65	1.63583	2147	2276	68	122	145	2079	14.855	31.5735	3.34323	19.3509	31.5121	1.62846
8	3	71	TCP10	JHU10063.B8C3	1279	1304	53	104	121	1226	9.917	24.1321	2.35792	1837	1833	52	113	194	1785	8.866	35.3269	3.84331	24.968	34.9086	1.39813
8	3	72	TCP10	JHU10063.B8C3	1316	1253	51	102	127	1265	9.063	25.8039	2.57813	1759	1747	51	105	137	1708	11.985	34.4902	3.73183	24.968	34.9086	1.39813
7	22	71	BSND	JHU10085.B7C22	1320	1505	50	99	133	1270	10.571	26.4	2.65664	1684	1725	53	112	144	1631	11.201	31.7736	3.36988	27.4451	32.3868	1.18006
7	22	72	BSND	JHU10085.B7C22	1453	1471	51	103	132	1402	10.364	28.4902	2.93196	1617	1656	49	102	146	1568	10.644	33	3.53328	27.4451	32.3868	1.18006
5	11	69	C1QL1	JHU10186.B5C11	1512	1566	55	103	116	1457	12.612	27.4909	2.80033	1677	1734	58	112	129	1619	12.574	28.9138	2.98886	26.0312	28.7162	1.10315
5	11	70	C1QL1	JHU10186.B5C11	1376	1441	56	109	130	1320	10.246	24.5714	2.41579	1540	1635	54	108	125	1486	12.216	28.5185	2.93619	26.0312	28.7162	1.10315
15	23	83	PNMA5	JHU10240.B15C23	972	1029	50	99	116	922	8.017	19.44	1.73989	1485	1526	50	100	123	1435	11.593	29.7	3.09361	17.78	29.2538	1.64532
15	23	84	PNMA5	JHU10240.B15C23	806	854	50	98	111	756	6.811	16.12	1.30259	1498	1491	52	105	137	1446	10.117	28.8077	2.97472	17.78	29.2538	1.64532
15	6	79	CAT	JHU11244.B15C6	1462	1525	57	106	123	1405	11.537	25.6491	2.55774	2163	2207	62	109	119	2101	17.63	34.8871	3.78471	24.4561	35.4953	1.45138
15	6	80	CAT	JHU11244.B15C6	1326	1394	57	107	119	1269	10.815	23.2632	2.24346	2094	2038	58	112	134	2036	14.373	36.1034	3.94677	24.4561	35.4953	1.45138
7	11	87	ATP5A1	JHU11331.B7C11	1346	1406	54	113	154	1292	8.396	24.9259	2.46248	1657	1609	55	105	126	1602	11.937	30.1273	3.15053	24.9826	29.6108	1.18526
7	11	88	ATP5A1	JHU11331.B7C11	1277	1340	51	106	142	1226	8.69	25.0392	2.4774	1542	1631	53	104	133	1489	11.481	29.0943	3.01291	24.9826	29.6108	1.18526
11	15	5	TIRAP	JHU11597.B11C15	1209	1306	51	103	123	1158	9.78	23.7059	2.30178	1496	1539	53	112	146	1443	9.774	28.2264	2.89727	23.6863	28.2574	1.19299
11	15	6	TIRAP	JHU11597.B11C15	1207	1241	51	100	117	1156	9.752	23.6667	2.29661	1471	1516	52	112	143	1419	9.818	28.2885	2.90554	23.6863	28.2574	1.19299
10	1	3	INTS3	JHU11748.B10C1	1679	1987	59	121	176	1620	10.602	28.4576	2.92767	2162	2369	62	115	134	2100	16.821	34.871	3.78256	27.0075	34.0202	1.25966
10	1	4	INTS3	JHU11748.B10C1	1559	1977	61	125	176	1498	10.523	25.5574	2.54565	1957	2128	59	112	132	1898	15.273	33.1695	3.55586	27.0075	34.0202	1.25966
11	25	11	BCL6	JHU12067.B11C25	1284	1301	48	97	120	1236	10.033	26.75	2.70274	1488	1502	54	102	118	1434	11.864	27.5556	2.80789	24.4464	27.8162	1.13784
11	25	12	BCL6	JHU12067.B11C25	1085	1105	49	96	113	1036	8.929	22.1429	2.0959	1460	1392	52	103	146	1408	8.829	28.0769	2.87736	24.4464	27.8162	1.13784
11	4	7	ITPKB	JHU12104.B11C4	1802	1868	69	133	163	1733	10.644	26.1159	2.61923	2144	2142	64	119	132	2080	15.326	33.5	3.5999	27.5262	33.3864	1.21289
11	4	8	ITPKB	JHU12104.B11C4	1823	1882	63	129	173	1760	10.133	28.9365	2.99074	1830	1804	55	110	125	1775	13.552	33.2727	3.56962	27.5262	33.3864	1.21289
11	8	15	ADSSL1	JHU12349.B11C8	1439	1474	49	101	129	1390	10.643	29.3673	3.04749	2155	2188	55	104	119	2100	17.513	39.1818	4.35691	28.2041	38.0727	1.3499
11	8	16	ADSSL1	JHU12349.B11C8	1325	1313	49	101	123	1276	9.854	27.0408	2.74105	2033	2098	55	110	133	1978	14.947	36.9636	4.06137	28.2041	38.0727	1.3499
11	22	15	TOMM40	JHU12431.B11C22	1325	1383	47	93	115	1278	11.217	28.1915	2.89261	1494	1574	52	105	141	1442	10.418	28.7308	2.96447	27.7697	29.2085	1.05181
11	22	16	TOMM40	JHU12431.B11C22	1258	1355	46	91	118	1212	10.712	27.3478	2.78149	1514	1570	51	102	131	1463	11.206	29.6863	3.09178	27.7697	29.2085	1.05181
4	16	1	ARF6	JHU00197.B4C16	1331	1379	51	102	124	1280	10.298	26.098	2.61687	1656	1682	60	116	151	1596	10.371	27.6	2.81381	25.3824	27.869	1.09797
4	16	2	ARF6	JHU00197.B4C16	1184	1319	48	98	122	1136	10.008	24.6667	2.42833	1632	1660	58	111	141	1574	10.986	28.1379	2.88548	25.3824	27.869	1.09797
9	8	19	PGD	JHU12787.B9C8	1635	1773	79	144	173	1556	9.416	20.6962	1.90535	2308	2336	78	149	184	2230	11.886	29.5897	3.07892	20.9022	29.7663	1.42408
9	8	20	PGD	JHU12787.B9C8	1562	1627	74	143	172	1488	8.628	21.1081	1.95961	2096	2127	70	138	168	2026	11.839	29.9429	3.12596	20.9022	29.7663	1.42408
10	25	21	ALDH16A1	JHU12828.B10C25	1344	1412	51	102	117	1293	11.197	26.3529	2.65044	2214	2279	60	108	129	2154	16.829	36.9	4.0529	26.3431	35.3094	1.34036
10	25	22	ALDH16A1	JHU12828.B10C25	1343	1369	51	108	139	1292	9.072	26.3333	2.64786	2158	2234	64	124	150	2094	14.067	33.7188	3.62904	26.3431	35.3094	1.34036
11	30	25	ANKS1B	JHU13311.B11C30	1334	1378	45	90	109	1289	11.817	29.6444	3.08399	1433	1535	52	102	127	1381	11.283	27.5577	2.80818	27.291	28.0952	1.02947
11	30	26	ANKS1B	JHU13311.B11C30	1197	1282	48	95	110	1149	10.791	24.9375	2.46401	1403	1470	49	99	121	1354	11.331	28.6327	2.9514	27.291	28.0952	1.02947
9	21	25	RUNDC1	JHU13374.B9C21	1618	1715	54	106	123	1564	13.081	29.963	3.12595	1953	2012	70	122	137	1883	13.796	27.9	2.85378	28.3704	28.45	1.00281
9	21	26	RUNDC1	JHU13374.B9C21	1446	1547	54	108	134	1392	10.739	26.7778	2.7064	1885	1980	65	117	136	1820	13.699	29	3.00034	28.3704	28.45	1.00281
10	2	31	FARSB	JHU13438.B10C2	1280	1297	53	112	195	1227	6.077	24.1509	2.3604	1798	1794	62	112	123	1736	13.675	29	3.00034	22.7026	29.3083	1.29097
10	2	32	FARSB	JHU13438.B10C2	1254	1334	59	112	187	1195	6.535	21.2542	1.97885	1777	1763	60	108	116	1717	14.267	29.6167	3.0825	22.7026	29.3083	1.29097
12	9	33	DNAJB5	JHU13520.B12C9	1412	1563	46	95	118	1366	12.441	30.6957	3.22245	1627	1801	58	116	149	1569	11.309	28.0517	2.874	28.0652	27.8241	0.991409
12	9	34	DNAJB5	JHU13520.B12C9	1170	1341	46	92	117	1124	10.675	25.4348	2.52951	1573	1601	57	113	158	1516	9.418	27.5965	2.81335	28.0652	27.8241	0.991409
10	16	33	NECAB1	JHU13620.B10C16	1455	1479	57	104	114	1398	12.061	25.5263	2.54156	1784	1842	64	113	129	1720	13.403	27.875	2.85045	25.7915	28.6696	1.11159
10	16	34	NECAB1	JHU13620.B10C16	1381	1491	53	100	116	1328	11.991	26.0566	2.61141	1650	1707	56	113	153	1594	10.418	29.4643	3.0622	25.7915	28.6696	1.11159
14	30	9	MTERF4	JHU13646.B14C30	1551	1576	49	99	128	1502	11.539	31.6531	3.34856	1980	2070	63	113	125	1917	15.656	31.4286	3.32391	29.4307	31.96	1.08594
14	30	10	MTERF4	JHU13646.B14C30	1306	1434	48	97	128	1258	10.445	27.2083	2.76311	1917	1924	59	109	126	1858	14.405	32.4915	3.46553	29.4307	31.96	1.08594
9	25	35	RTCA	JHU13663.B9C25	1234	1293	51	96	108	1183	11.083	24.1961	2.36635	1778	1830	52	102	123	1726	14.049	34.1923	3.69214	23.8838	33.898	1.41929
9	25	36	RTCA	JHU13663.B9C25	1155	1158	49	94	121	1106	8.793	23.5714	2.28407	1781	1761	53	102	125	1728	13.272	33.6038	3.61372	23.8838	33.898	1.41929
11	16	31	TMOD1	JHU13681.B11C16	1506	1539	55	113	148	1451	9.635	27.3818	2.78596	1684	1706	56	108	135	1628	11.837	30.0714	3.14309	26.2294	29.1585	1.11167
11	16	32	TMOD1	JHU13681.B11C16	1304	1365	52	102	136	1252	9.287	25.0769	2.48237	1610	1629	57	103	122	1553	12.508	28.2456	2.89983	26.2294	29.1585	1.11167
9	28	33	KCNAB1	JHU13741.B9C28	1564	1546	51	98	108	1513	13.407	30.6667	3.21864	1877	1975	61	113	126	1816	14.778	30.7705	3.23623	28.9487	30.8344	1.06514
9	28	34	KCNAB1	JHU13741.B9C28	1416	1511	52	101	116	1364	12.155	27.2308	2.76607	1823	1813	59	109	131	1764	13.008	30.8983	3.25326	28.9487	30.8344	1.06514
10	23	37	GFM1	JHU13814.B10C23	1278	1439	50	97	117	1228	11.47	25.56	2.546	1789	1842	59	109	132	1730	13.129	30.322	3.17648	23.0432	31.374	1.36153
10	23	38	GFM1	JHU13814.B10C23	1170	1277	57	104	119	1113	9.857	20.5263	1.88297	1751	1733	54	103	129	1697	12.636	32.4259	3.45679	23.0432	31.374	1.36153
9	23	41	NUPL2	JHU13836.B9C23	1104	1193	50	95	111	1054	9.892	22.08	2.08762	1543	1626	54	106	136	1489	11.176	28.5741	2.94359	20.49	28.3543	1.38381
9	23	42	NUPL2	JHU13836.B9C23	945	1079	50	100	116	895	8.44	18.9	1.66876	1463	1593	52	108	144	1411	10.313	28.1346	2.88504	20.49	28.3543	1.38381
9	32	41	OLFML3	JHU13954.B9C32	1560	1744	51	104	135	1509	12.148	30.5882	3.20831	2053	2024	53	110	138	2000	13.87	38.7358	4.29749	28.698	36.541	1.2733
9	32	42	OLFML3	JHU13954.B9C32	1394	1586	52	104	125	1342	11.856	26.8077	2.71034	1786	1916	52	106	127	1734	14.252	34.3462	3.71264	28.698	36.541	1.2733
10	27	39	TP53	JHU13973.B10C27	1731	1768	52	106	128	1679	12.984	33.2885	3.56397	1902	1948	65	119	153	1837	11.954	29.2615	3.03519	29.8442	30.0824	1.00798
10	27	40	TP53	JHU13973.B10C27	1584	1692	60	127	163	1524	9.601	26.4	2.65664	1916	1933	62	117	155	1854	11.716	30.9032	3.25392	29.8442	30.0824	1.00798
11	16	41	KBTBD6	JHU14020.B11C16	1337	1489	47	101	122	1290	11.377	28.4468	2.92624	1511	1628	53	103	117	1458	13.034	28.5094	2.93498	27.6582	29.1747	1.05483
11	16	42	KBTBD6	JHU14020.B11C16	1236	1310	46	96	116	1190	10.466	26.8696	2.71849	1492	1485	50	97	111	1442	12.505	29.84	3.11226	27.6582	29.1747	1.05483
11	25	89	MAPK8IP2	JHU14022.B11C25	1491	1566	48	92	114	1443	12.93	31.0625	3.27078	1805	1771	54	105	128	1751	13.016	33.4259	3.59003	28.7013	32.7744	1.14191
11	25	90	MAPK8IP2	JHU14022.B11C25	1317	1357	50	94	110	1267	11.482	26.34	2.64874	1831	1853	57	103	118	1774	14.831	32.1228	3.41641	28.7013	32.7744	1.14191
10	16	37	SFMBT1	JHU14047.B10C16	1472	1529	58	106	115	1414	12.374	25.3793	2.5222	1726	1796	62	114	135	1664	12.459	27.8387	2.84562	27.7093	28.3763	1.02407
10	16	38	SFMBT1	JHU14047.B10C16	1532	1593	51	107	160	1481	9.288	30.0392	3.13599	1677	1753	58	114	140	1619	11.707	28.9138	2.98886	27.7093	28.3763	1.02407
10	5	43	PRKCI	JHU14234.B10C5	1264	1333	53	104	127	1211	9.677	23.8491	2.32064	1771	1839	56	106	133	1715	13.03	31.625	3.35008	24.0591	29.7532	1.23667
10	5	44	PRKCI	JHU14234.B10C5	1262	1344	52	105	117	1210	10.59	24.2692	2.37598	1645	1690	59	109	149	1586	10.611	27.8814	2.8513	24.0591	29.7532	1.23667
15	7	77	CDKN2A	JHU14378.B15C7	1194	1196	49	99	113	1145	9.708	24.3673	2.38891	1846	1817	56	107	127	1790	13.465	32.9643	3.52852	21.4721	31.2321	1.45454
15	7	78	CDKN2A	JHU14378.B15C7	966	1012	52	100	117	914	7.795	18.5769	1.62621	1711	1709	58	110	131	1653	12.206	29.5	3.06696	21.4721	31.2321	1.45454
9	27	49	TYMP	JHU14640.B9C27	1524	1539	58	120	170	1466	8.347	26.2759	2.64029	1742	1759	55	108	135	1687	12.23	31.6727	3.35644	27.4587	30.6083	1.1147
9	27	50	TYMP	JHU14640.B9C27	1518	1513	53	118	182	1465	7.665	28.6415	2.95189	1684	1688	57	112	142	1627	11.099	29.5439	3.0728	27.4587	30.6083	1.1147
9	8	53	GPI	JHU14648.B9C8	1307	1314	57	117	151	1250	7.927	22.9298	2.19956	1658	1682	51	106	139	1607	11.338	32.5098	3.46797	23.581	31.1349	1.32034
9	8	54	GPI	JHU14648.B9C8	1357	1344	56	131	185	1301	6.557	24.2321	2.3711	1488	1524	50	104	144	1438	9.861	29.76	3.1016	23.581	31.1349	1.32034
10	1	49	FST	JHU14746.B10C1	1335	1456	52	101	113	1283	11.991	25.6731	2.56089	1641	1733	53	117	212	1588	7.623	30.9623	3.26178	25.9444	31.9082	1.22987
10	1	50	FST	JHU14746.B10C1	1337	1414	51	103	121	1286	10.835	26.2157	2.63236	1577	1678	48	98	126	1529	12.54	32.8542	3.51385	25.9444	31.9082	1.22987
9	25	49	TMEM134	JHU14792.B9C25	1266	1327	52	109	142	1214	8.577	24.3462	2.38611	1735	1831	58	113	137	1677	12.54	29.9138	3.12209	23.6731	29.2399	1.23515
9	25	50	TMEM134	JHU14792.B9C25	1196	1282	52	109	141	1144	8.319	23	2.2088	1514	1625	53	105	129	1461	11.783	28.566	2.94252	23.6731	29.2399	1.23515
9	19	49	WARS	JHU14803.B9C19	1279	1300	51	110	144	1228	8.264	25.0784	2.48257	1595	1656	47	98	114	1548	13.667	33.9362	3.65801	23.5124	32.2662	1.3723
9	19	50	WARS	JHU14803.B9C19	1229	1268	56	108	124	1173	9.355	21.9464	2.07003	1591	1642	52	103	125	1539	12.312	30.5962	3.21301	23.5124	32.2662	1.3723
9	5	59	GLT1D1	JHU14940.B9C5	1260	1357	52	101	116	1208	10.828	24.2308	2.37092	1548	1595	52	100	114	1496	13.114	29.7692	3.10283	24.7889	28.7714	1.16066
9	5	60	GLT1D1	JHU14940.B9C5	1242	1242	49	97	111	1193	10.315	25.3469	2.51794	1472	1511	53	101	114	1419	12.368	27.7736	2.83694	24.7889	28.7714	1.16066
11	29	57	AAK1_frag	JHU15034.B11C29	1560	1620	48	93	117	1512	13.051	32.5	3.46012	1604	1670	49	101	131	1555	11.977	32.7347	3.49793	29.5904	30.6654	1.03633
11	29	58	AAK1_frag	JHU15034.B11C29	1254	1404	47	93	112	1207	11.705	26.6809	2.69364	1487	1609	52	99	121	1435	12.479	28.5962	2.94654	29.5904	30.6654	1.03633
10	20	63	VASP	JHU15379.B10C20	1726	1854	59	120	183	1667	9.475	29.2542	3.0326	1799	1953	61	123	179	1738	10.223	29.4918	3.06587	26.9468	29.0626	1.07852
10	20	64	VASP	JHU15379.B10C20	1503	1615	61	116	151	1442	9.927	24.6393	2.42473	1718	1904	60	128	264	1658	6.727	28.6333	2.95149	26.9468	29.0626	1.07852
10	29	65	KDM1A	JHU15386.B10C29	1692	1714	57	106	124	1635	12.968	29.6842	3.08923	2132	2057	61	116	139	2071	13.964	34.9508	3.7932	28.3421	36.5771	1.29056
10	29	66	KDM1A	JHU15386.B10C29	1647	1692	61	107	116	1586	13.664	27	2.73567	2254	2189	59	109	125	2195	16.64	38.2034	4.22655	28.3421	36.5771	1.29056
9	25	65	RAP1GAP	JHU15557.B9C25	1363	1435	48	97	108	1315	12.389	28.3958	2.91953	1677	1774	53	102	122	1624	13.705	31.6415	3.35228	26.9688	29.9208	1.10946
9	25	66	RAP1GAP	JHU15557.B9C25	1226	1342	48	100	122	1178	10.18	25.5417	2.54358	1551	1547	55	102	113	1496	12.788	28.2	2.89375	26.9688	29.9208	1.10946
16	8	73	MAT2B	JHU16009.B16C8	1166	1221	48	98	140	1118	8.021	24.2917	2.37894	1803	1813	56	105	142	1747	12.028	32.1964	3.42622	22.4144	29.9236	1.33502
16	8	74	MAT2B	JHU16009.B16C8	1109	1190	54	103	123	1055	8.837	20.537	1.88439	1742	1691	63	113	136	1679	11.603	27.6508	2.82058	22.4144	29.9236	1.33502
10	6	73	SPRTN	JHU16256.B10C6	1498	1589	65	121	140	1433	10.486	23.0462	2.21488	1786	1937	56	113	132	1730	13.818	31.8929	3.38577	22.687	32.6257	1.43808
10	6	74	SPRTN	JHU16256.B10C6	1362	1402	61	113	133	1301	9.692	22.3279	2.12027	1768	1897	53	107	125	1715	14.32	33.3585	3.58104	22.687	32.6257	1.43808
10	23	79	ALDH1A3	JHU16390.B10C23	1381	1429	52	102	119	1329	11.151	26.5577	2.67741	1915	1939	58	116	143	1857	12.748	33.0172	3.53558	24.609	31.5633	1.28259
10	23	80	ALDH1A3	JHU16390.B10C23	1201	1297	53	107	140	1148	8.5	22.6604	2.16407	1927	2360	64	122	142	1863	15.761	30.1094	3.14815	24.609	31.5633	1.28259
9	2	81	KJ902480.1_frag	JHU16429.B9C2	1234	1333	49	98	121	1185	10.207	25.1837	2.49643	1554	1626	53	110	130	1501	11.662	29.3208	3.04308	24.6484	29.9349	1.21447
9	2	82	KJ902480.1_frag	JHU16429.B9C2	1278	1411	53	103	126	1225	10.381	24.1132	2.35543	1558	1674	51	106	136	1507	11.529	30.549	3.20673	24.6484	29.9349	1.21447
9	25	79	ZNF761	JHU16621.B9C25	1323	1464	53	106	143	1270	9.497	24.9623	2.46727	1499	1538	51	99	124	1448	11.605	29.3922	3.05259	24.9234	31.0761	1.24686
9	25	80	ZNF761	JHU16621.B9C25	1294	1371	52	101	118	1242	10.763	24.8846	2.45704	1638	1685	50	103	132	1588	11.985	32.76	3.5013	24.9234	31.0761	1.24686
14	26	41	CASK	JHU17128.B14C26	1512	1539	58	111	130	1454	10.985	26.069	2.61304	1952	1993	60	124	156	1892	11.981	32.5333	3.4711	24.097	31.7585	1.31794
14	26	42	CASK	JHU17128.B14C26	1416	1478	64	116	135	1352	10.089	22.125	2.09355	1890	1865	61	121	144	1829	12.111	30.9836	3.26463	24.097	31.7585	1.31794
15	11	73	TACC1	JHU17245.B15C11	1444	1483	54	103	130	1390	10.615	26.7407	2.70152	2042	2059	65	122	147	1977	13.177	31.4154	3.32216	26.5043	33.5937	1.26748
15	11	74	TACC1	JHU17245.B15C11	1471	1506	56	108	135	1415	10.356	26.2679	2.63924	2039	2065	57	114	138	1982	14.138	35.7719	3.9026	26.5043	33.5937	1.26748
15	12	39	SRMS	JHU17317.B15C12	1410	1458	47	96	118	1363	11.542	30	3.13083	1580	1735	56	107	124	1524	13.129	28.2143	2.89566	26.62	28.277	1.06224
15	12	40	SRMS	JHU17317.B15C12	1162	1273	50	98	119	1112	9.874	23.24	2.24041	1502	1625	53	101	117	1449	13.026	28.3396	2.91236	26.62	28.277	1.06224
15	28	39	RSPH6A	JHU17380.B15C28	1348	1407	52	103	136	1296	9.588	25.9231	2.59382	2192	2141	63	121	144	2129	14.028	34.7937	3.77226	26.4904	32.9039	1.24211
15	28	40	RSPH6A	JHU17380.B15C28	1407	1475	52	104	122	1355	11.238	27.0577	2.74327	2202	2163	71	124	140	2131	14.564	31.0141	3.26869	26.4904	32.9039	1.24211
15	17	63	KCTD2	JHU17913.B15C17	1446	1522	55	106	121	1391	11.702	26.2909	2.64227	2090	2101	55	110	125	2035	15.928	38	4.19945	25.7705	36.1909	1.40436
15	17	64	KCTD2	JHU17913.B15C17	1313	1414	52	102	118	1261	11.119	25.25	2.50517	1891	1967	55	109	128	1836	14.516	34.3818	3.71739	25.7705	36.1909	1.40436
14	29	61	USP7	JHU17961.B14C29	1476	1550	52	103	123	1424	11.764	28.3846	2.91805	1864	1938	65	122	144	1799	12.611	28.6769	2.9573	27.8198	30.5885	1.09952
14	29	62	USP7	JHU17961.B14C29	1390	1417	51	101	117	1339	11.248	27.2549	2.76925	1820	1816	56	110	125	1764	13.648	32.5	3.46666	27.8198	30.5885	1.09952
15	19	63	SFMBT2	JHU18027.B15C19	1565	1605	66	123	137	1499	10.818	23.7121	2.3026	2473	2495	71	131	169	2402	13.988	34.831	3.77723	24.5371	34.9919	1.42608
15	19	64	SFMBT2	JHU18027.B15C19	1471	1507	58	119	141	1413	9.844	25.3621	2.51993	2531	2490	72	132	165	2459	14.291	35.1528	3.82011	24.5371	34.9919	1.42608
14	6	65	SOCS7	JHU18030.B14C6	1404	1511	53	101	125	1351	11.28	26.4906	2.66857	1891	2021	67	121	136	1824	13.971	28.2239	2.89694	25.5786	28.9316	1.13109
14	6	66	SOCS7	JHU18030.B14C6	1406	1553	57	109	141	1349	10.241	24.6667	2.42833	1808	1871	61	118	142	1747	12.345	29.6393	3.08553	25.5786	28.9316	1.13109
16	1	61	XDH	JHU18042.B16C1	1387	1471	56	107	125	1331	10.912	24.7679	2.44166	2235	2174	59	107	126	2176	16.405	37.8814	4.18365	25.3748	38.6687	1.5239
16	1	62	XDH	JHU18042.B16C1	1429	1419	55	107	135	1374	9.719	25.9818	2.60156	2249	2134	57	106	124	2192	16.355	39.4561	4.39346	25.3748	38.6687	1.5239
14	26	37	HSPA12A	JHU18091.B14C26	1091	1134	51	99	110	1040	9.409	21.3922	1.99702	1508	1590	49	109	183	1459	8.093	30.7755	3.2369	21.4261	29.8978	1.39539
14	26	38	HSPA12A	JHU18091.B14C26	1073	1108	50	100	114	1023	8.842	21.46	2.00596	1451	1476	50	98	118	1401	11.678	29.02	3.00301	21.4261	29.8978	1.39539
14	2	45	DPH1	JHU18179.B14C2	1471	1510	50	100	122	1421	11.557	29.42	3.05443	1828	1843	64	120	133	1764	12.955	28.5625	2.94205	27.612	29.1812	1.05683
14	2	46	DPH1	JHU18179.B14C2	1316	1409	51	102	120	1265	10.892	25.8039	2.57813	1788	1786	60	108	120	1728	13.983	29.8	3.10693	27.612	29.1812	1.05683
15	14	47	CCDC102A	JHU18244.B15C14	1691	1757	51	105	130	1640	12.708	33.1569	3.54664	2114	2093	57	117	163	2057	12.123	37.0877	4.07791	29.403	35.0269	1.19127
15	14	48	CCDC102A	JHU18244.B15C14	1462	1547	57	112	142	1405	10.106	25.6491	2.55774	1945	1959	59	112	135	1886	13.681	32.9661	3.52876	29.403	35.0269	1.19127
14	1	87	DPP9	JHU18256.B14C1	1471	1571	56	105	123	1415	11.919	26.2679	2.63924	1830	1838	63	120	134	1767	12.821	29.0476	3.00669	26.2857	28.4321	1.08166
14	1	88	DPP9	JHU18256.B14C1	1473	1552	56	105	124	1417	11.669	26.3036	2.64394	1669	1798	60	123	166	1609	10.09	27.8167	2.84268	26.2857	28.4321	1.08166
15	16	45	DOK2	JHU18356.B15C16	1348	1407	52	96	117	1296	11.205	25.9231	2.59382	2026	2002	51	102	118	1975	16.102	39.7255	4.42935	25.2634	35.4431	1.40294
15	16	46	DOK2	JHU18356.B15C16	1304	1353	53	99	118	1251	10.627	24.6038	2.42005	1745	1823	56	107	137	1689	12.526	31.1607	3.28822	25.2634	35.4431	1.40294
15	10	43	CABP1	JHU18439.B15C10	1235	1341	49	94	109	1186	11.44	25.2041	2.49912	1595	1675	57	118	144	1538	10.813	27.9825	2.86477	25.0204	28.7931	1.15079
15	10	44	CABP1	JHU18439.B15C10	1217	1277	49	99	145	1168	8.124	24.8367	2.45073	1569	1634	53	104	123	1516	12.439	29.6038	3.08079	25.0204	28.7931	1.15079
15	4	51	RABL2A	JHU18715.B15C4	1287	1366	50	96	110	1237	11.545	25.74	2.56971	1682	1765	56	110	132	1626	12.538	30.0357	3.13834	24.46	29.5089	1.20642
15	4	52	RABL2A	JHU18715.B15C4	1159	1269	50	102	135	1109	8.644	23.18	2.23251	1623	1654	56	107	133	1567	11.632	28.9821	2.99796	24.46	29.5089	1.20642
15	29	19	MSRB2	JHU19120.B15C29	1447	1478	54	104	129	1393	10.651	26.7963	2.70884	1910	1812	56	112	151	1854	11.258	34.1071	3.68079	26.7881	33.0999	1.23562
15	29	20	MSRB2	JHU19120.B15C29	1339	1374	50	99	121	1289	10.537	26.78	2.70669	1733	1705	54	106	129	1679	12.395	32.0926	3.41238	26.7881	33.0999	1.23562
15	4	19	VWA8	JHU19205.B15C4	1471	1476	48	100	117	1423	11.761	30.6458	3.21589	1974	1991	60	113	127	1914	14.787	32.9	3.51996	27.1188	32.3875	1.19428
15	4	20	VWA8	JHU19205.B15C4	1156	1284	49	101	114	1107	10.377	23.5918	2.28676	1785	1808	56	109	127	1729	13.378	31.875	3.38339	27.1188	32.3875	1.19428
15	10	23	COLGALT1	JHU19292.B15C10	1446	1595	50	102	128	1396	11.664	28.92	2.98857	1932	1939	53	107	126	1879	14.54	36.4528	3.99332	25.911	34.1907	1.31954
15	10	24	COLGALT1	JHU19292.B15C10	1168	1207	51	100	118	1117	9.381	22.902	2.19589	1788	1880	56	107	124	1732	14.298	31.9286	3.39053	25.911	34.1907	1.31954
16	4	77	SPON1	JHU19340.B16C4	1423	1533	59	109	133	1364	10.707	24.1186	2.35615	1861	1828	63	108	124	1798	13.871	29.5397	3.07225	23.123	28.7444	1.24311
16	4	78	SPON1	JHU19340.B16C4	1217	1258	55	110	148	1162	7.757	22.1273	2.09385	1649	1727	59	113	134	1590	12.045	27.9492	2.86033	23.123	28.7444	1.24311
14	3	27	PHOSPHO1	JHU19414.B14C3	1632	1669	50	102	121	1582	12.95	32.64	3.47856	2064	2125	63	115	134	2001	15	32.7619	3.50156	29.6729	32.556	1.09716
14	3	28	PHOSPHO1	JHU19414.B14C3	1362	1389	51	103	124	1311	10.371	26.7059	2.69693	1941	1928	60	115	135	1881	13.43	32.35	3.44668	29.6729	32.556	1.09716
15	17	79	DGKH	JHU19468.B15C17	1484	1556	53	106	130	1431	11.154	28	2.86739	1778	1925	56	100	110	1722	16.591	31.75	3.36674	26.92	31.9135	1.18549
15	17	80	DGKH	JHU19468.B15C17	1292	1396	50	97	115	1242	11.296	25.84	2.58288	1668	1730	52	101	111	1616	14.676	32.0769	3.4103	26.92	31.9135	1.18549
14	27	27	DGKQ	JHU19469.B14C27	1410	1491	52	97	112	1358	12.446	27.1154	2.75087	1679	1768	55	109	137	1624	12.109	30.5273	3.20383	26.0056	29.2729	1.12564
14	27	28	DGKQ	JHU19469.B14C27	1195	1302	48	93	105	1147	11.514	24.8958	2.45852	1513	1549	54	103	121	1459	11.95	28.0185	2.86957	26.0056	29.2729	1.12564
15	15	5	Lin28a	JHU19586.B15C15	1298	1350	49	98	136	1249	9.206	26.4898	2.66847	1780	1767	60	113	131	1720	12.626	29.6667	3.08917	26.4082	30.3515	1.14932
15	15	6	Lin28a	JHU19586.B15C15	1290	1314	49	98	137	1241	8.876	26.3265	2.64696	1707	1819	55	111	131	1652	13.038	31.0364	3.27166	26.4082	30.3515	1.14932
15	17	3	Dmrt2_frag	JHU19624.B15C17	1264	1339	51	99	116	1213	10.69	24.7843	2.44383	1627	1766	57	106	128	1570	12.969	28.5439	2.93957	25.1005	28.7625	1.14589
15	17	4	Dmrt2_frag	JHU19624.B15C17	1220	1229	48	101	119	1172	9.479	25.4167	2.52712	1536	1621	53	104	134	1483	11.321	28.9811	2.99783	25.1005	28.7625	1.14589
14	10	85	PAIP1	JHU21667.B14C10	1473	1535	53	100	111	1420	12.928	27.7925	2.84005	1687	1717	56	110	137	1631	11.73	30.125	3.15023	26.5814	29.2913	1.10195
14	10	86	PAIP1	JHU21667.B14C10	1370	1437	54	101	115	1316	11.617	25.3704	2.52102	1679	1680	59	108	120	1620	13.1	28.4576	2.92808	26.5814	29.2913	1.10195
14	4	89	ZDHHC5	JHU22781.B14C4	1689	1799	56	108	130	1633	13.008	30.1607	3.15199	2173	2247	69	123	138	2104	15.391	31.4928	3.33246	28.0258	31.1771	1.11244
14	4	90	ZDHHC5	JHU22781.B14C4	1424	1553	55	106	125	1369	11.576	25.8909	2.58959	2006	2090	65	115	129	1941	15.31	30.8615	3.24836	28.0258	31.1771	1.11244
15	21	61	HECW2	JHU29114.B15C21	1349	1354	59	106	125	1290	9.984	22.8644	2.19094	2339	2307	65	117	136	2274	16.103	35.9846	3.93094	24.6675	36.0717	1.46232
15	21	62	HECW2	JHU29114.B15C21	1350	1390	51	100	123	1299	10.488	26.4706	2.66594	2278	2321	63	122	146	2215	15.062	36.1587	3.95413	24.6675	36.0717	1.46232
20	17	35	PURB	JHU30062.B20C17	1379	1440	57	110	139	1322	9.568	24.193	2.36594	1749	1816	56	107	128	1693	13.352	31.2321	3.29774	26.1253	29.5982	1.13293
20	17	36	PURB	JHU30062.B20C17	1459	1471	52	108	137	1407	9.949	28.0577	2.87499	1566	1693	56	104	114	1510	13.939	27.9643	2.86235	26.1253	29.5982	1.13293

## Sheet: Data declaration
表头名	释义
Block	分区
Column	列
Row	行
Name	位点名称
ID	位点Clone ID。示例：JHU00289.P008E04："JHU00289" means the sequence ID and ".P008E04" means the location
F635 Median	635 nm波长下，位点前景信号值的中位数
B635 Median	635 nm波长下，位点背景信号值的中位数
F635 Median- B635 Median	635 nm波长下，位点前景信号值的中位数-背景信号值的中位数
SNR 635	信噪比= (F635 Mean-B635 Mean) / B635 SD
I	原始信号强度I，I= F635 Median / B635 Median
Z-Score	位点校正信号强度
IMean	该样本内各蛋白两重复位点I的均值
IMean_Ratio	计算实验组_vs_对照组，获得组间比值
